# Supplementary material
Source: publisher figshare collection journal article supplement (https://frontiersin.figshare.com/ndownloader/files/27790080)
Supplement: Supplementary file [file 27790080]

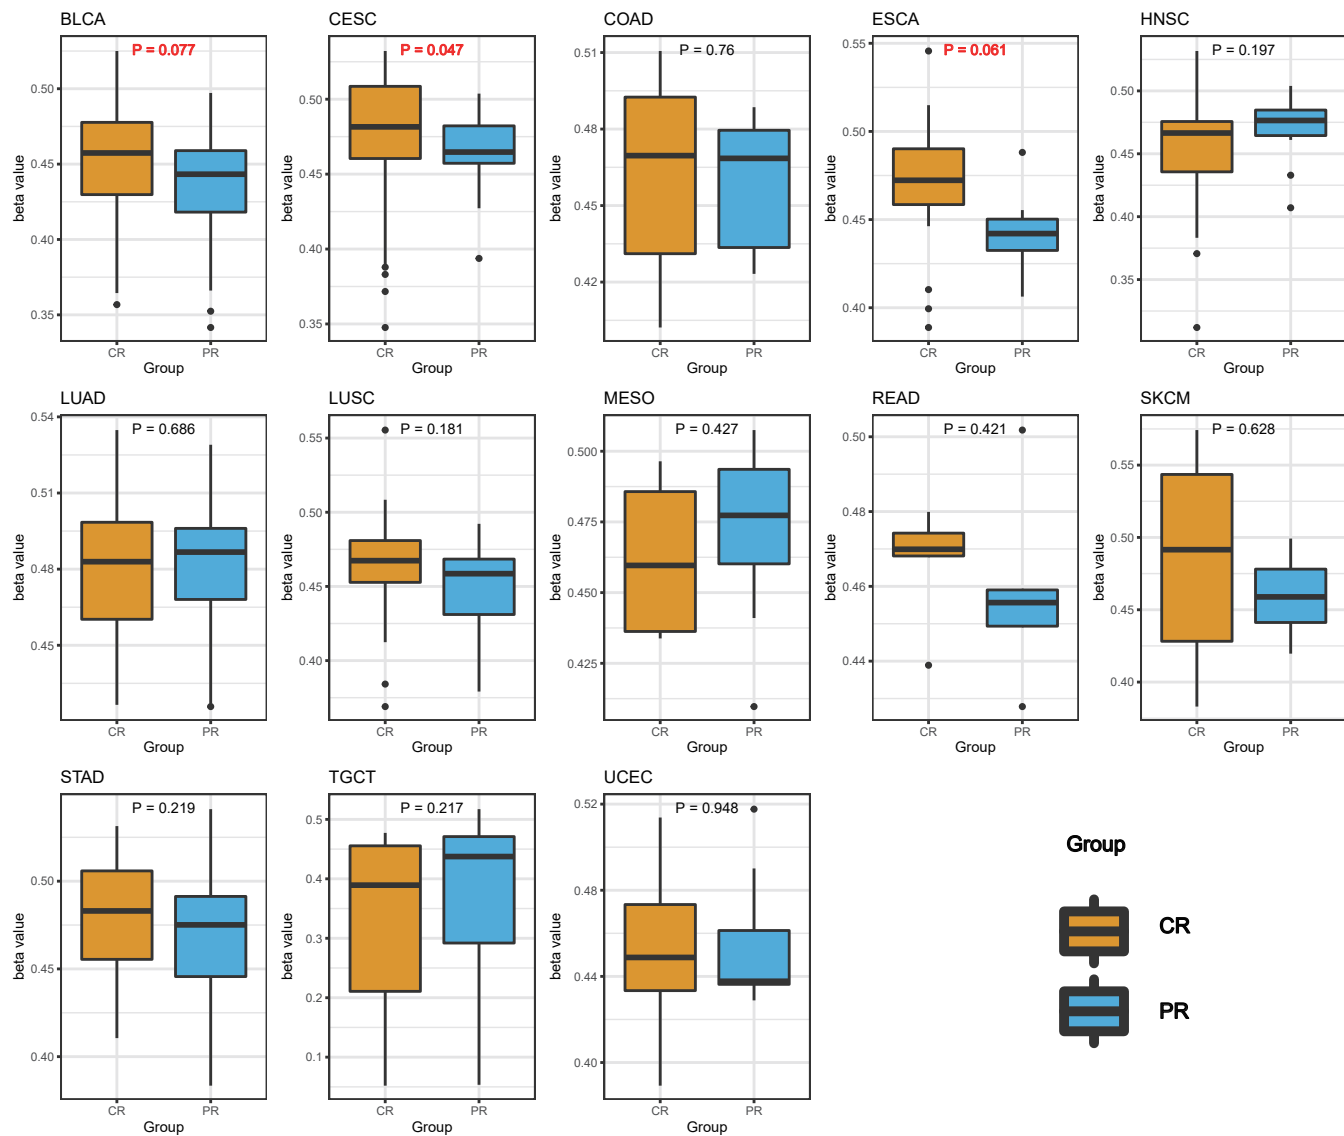

**FigureS1:** The overall methylation status between CR and PR groups in 13 different cancer types.
